# Supplementary material
Source: publisher site journal article supplement (https://static.cambridge.org/content/id/urn:cambridge.org:id:article:S1047951120004084/resource/name/S1047951120004084supp002.docx)
Supplement: Supplementary file 1 [file S1047951120004084supp002.docx]

**Supporting information:**

**Online video**

Video S1: Fluoroscopic image in left anterior oblique projection with cranial tilt shows the Cobra head deformity being used for successful deployment of atrial septal occluder.
